# Supplementary material for: Shared ancestral susceptibility to colorectal cancer and other nutrition related diseases
Source: PubMed Central journal article supplement (PMC3522999; doi:10.1186/1471-2350-13-94), 2012-10-05
Supplement: 1471-2350-13-94-S1.pdf [file 1471-2350-13-94-S1.pdf]

# Shared Ancestral Susceptibility to Colorectal Cancer and other Nutrition Related Diseases

## Authors:

Stefanie Huhn<sup>a,1</sup>, Melanie Bevier<sup>a</sup>, Anja Rudolph<sup>b</sup>, Barbara Pardini<sup>c</sup>, Alessio Naccarati<sup>c</sup>, Rebecca Hein<sup>b,\*</sup>, Michael Hoffmeister<sup>d</sup>, Ludmila Vodickova<sup>c,e</sup>, Jan Novotny<sup>f</sup>, Hermann Brenner<sup>d</sup>, Jenny Chang-Claude<sup>b</sup>, Kari Hemminki<sup>a,g</sup>, Pavel Vodicka<sup>c,e</sup>, Asta Försti<sup>a,g</sup>

## Affiliations:

<sup>a</sup> Department of Molecular Genetic Epidemiology, German Cancer Research Center (DKFZ), Heidelberg, 69120, Germany

<sup>b</sup> Division of Cancer Epidemiology, German Cancer Research Center (DKFZ), Heidelberg, 69120, Germany

<sup>c</sup> Institute of Experimental Medicine, Academy of Sciences of the Czech Republic, Prague 4, 14200, Czech Republic

<sup>d</sup> Division of Clinical Epidemiology and Aging Research, German Cancer Research Center (DKFZ), Heidelberg, 69120, Germany

<sup>e</sup> Institute of Biology and Medical Genetics, 1st Faculty of Medicine, Charles University, Prague 2, 12000, Czech Republic

<sup>f</sup> Department of Oncology, General Teaching Hospital, Prague, 12808, Czech Republic

<sup>g</sup> Center of Primary Health Care Research, Clinical Research Center, Lund University, Malmö, SE-20502, Sweden

## <sup>1</sup> Corresponding Author

Stefanie Huhn

German Cancer Research Center (DKFZ); Department of Molecular Genetic Epidemiology

Im Neuenheimer Feld 580; 69120 Heidelberg; Germany

phone: +49 6221 42 1803; fax: +49 6221 42 1810

email: s.huhn@dkfz.de

\* Current Affiliation of Rebecca Hein: PMV Forschungsgruppe, University of Cologne, Germany

## Keywords

Colorectal cancer, nutrition, complex diseases

## Introduction to the table

The study focused on SNPs, for which ancestral alleles have previously been associated with nutrition-related complex diseases other than CRC, such as obesity, T2D and metabolic syndrome. Information about such SNPs was collected from 30 published reports by browsing the PubMed database (<http://www.ncbi.nlm.nih.gov/sites/entrez?db=pubmed>) for the keywords “diabetes”, “obesity”, “metabolic syndrome” (OMIM ID: 605552) and “hypertension” (OMIM ID: 145500) up to 06/2009. Most of the articles were based on genome-wide association studies or were meta-analyses. A complete list of the publications can be found at the reference list of the additional file1.

Out of these 30 reports, associations with the risk of the diseases and with the related quantitative traits were retrieved. The quantitative traits for diabetes were fasting glucose level and insulin resistance. For obesity, the traits were body mass index (BMI) and waist to hip ratio. The quantitative traits for hypertension and the metabolic syndrome were high-density lipoprotein (HDL) level, low-density lipoprotein (LDL) level, triglycerides level, salt sensitivity, blood pressure and insulin resistance. A complete list of the reported associations can be found the additional file1.

Additional file1: Table I. Information about genes and SNPs considered as candidates for the case-control study.

| Closest Gene (GenBank ID)              | rs           | Chr      | Position    | SNP (AD)  | Risk on A or D | Associated Disease/Trait <sup>a</sup> (OMIM ID) | Function or Location                    | Source    |
|----------------------------------------|--------------|----------|-------------|-----------|----------------|-------------------------------------------------|-----------------------------------------|-----------|
| <i>ABCA1</i>                           | rs4149274    | 09q31.01 | 106.679.485 | AG        | A              | HDL                                             | intron                                  | [1]       |
| <i>ABCA1</i>                           | rs4149268    | 09q31.01 | 106.687.291 | TC        | A              | HDL                                             | intron                                  | [1]       |
| <i>ABCA1</i>                           | rs1883025    | 09q31.01 | 106.704.372 | TC        | A              | HDL                                             | intron                                  | [2]       |
| <i>ABCG8</i>                           | rs6544713    | 02p21.00 | 43.927.635  | CT        | D              | LDL                                             | intron                                  | [2]       |
| <i>ACE</i>                             | in intron 16 | 17q23.03 |             | Alu indel | A              | HT                                              | intron                                  | [3]       |
| <i>ADAMTS9</i>                         | rs4607103    | 03p14.01 | 64.687.194  | CT        | A              | T2D                                             | ADAMTS9 ~35kb up                        | [4]       |
| <i>ADD1</i>                            | rs4961       | 04p16.03 | 2.876.755   | GT        | A              | HT                                              | missense                                | [3]       |
| <i>ADRB2</i>                           | rs1042714    | 05q33.01 | 148.186.916 | GC        | A              | OB                                              | missense                                | [3]       |
| <i>ADRB3</i>                           | rs4994       | 08q12.00 | 37.943.205  | CT        | A              | BMI, OB, T2D                                    | missense                                | [3]       |
| <i>AGT</i>                             | rs699        | 01q22.02 | 228.912.667 | CT        | A              | HT                                              | missense                                | [3, 5]    |
| <i>AGT</i>                             | rs4762       | 01q22.02 | 228.912.850 | CT        | A              | HT                                              | missense                                | [3, 5]    |
| <i>AGT</i>                             | rs5051       | 01q22.02 | 228.916.745 | AG        | A              | HT                                              | 5'UTR                                   | [3, 5]    |
| <i>AH11</i>                            | rs1535435    | 06q23.03 | 135.798.965 | AG        | A              | T2D                                             | intron                                  | [6]       |
| <i>APOA1-APOC3-APOA4-APOA5; ZNF259</i> | rs964184     | 11q23.03 | 116.154.377 | CG        | D              | HDL, TG                                         | APOA5 ~11kb down;<br>ZNF259 ~100bp down | [1, 2]    |
| <i>APOA1-APOC3-APOA4-APOA5; ZNF259</i> | rs12286037   | 11q23.03 | 116.157.667 | CT        | D              | TG                                              | APOA5 ~9kb down;<br>intron ZNF259       | [1]       |
| <i>APOA5/A4/C3/A1</i>                  | rs486394     | 11q23.03 | 116.031.782 | AC        | D              | TG                                              | APOA5 ~134kb down;                      | [1]       |
| <i>APOA5/A4/C3/A1</i>                  | rs2000571    | 11q23.03 | 116.090.993 | GA        | D              | TG                                              | APOA5 ~74kb down;                       | [1]       |
| <i>APOA5/A4/C3/A1</i>                  | rs662799     | 11q23.03 | 116.169.167 | AG        | D              | TG                                              | APOA5 ~800bp up                         | [1]       |
| <i>APOB</i>                            | rs7557067    | 02p24.01 | 21.061.967  | AG        | A              | TG                                              | ~16kb up of APOB                        | [2]       |
| <i>APOB</i>                            | rs693        | 02p24.01 | 21.085.950  | CT        | D              | LDL, CAD                                        | ~35kb up                                | [1, 7]    |
| <i>APOB</i>                            | rs1713222    | 02p24.01 | 21.125.078  | CT        | A              | LDL                                             | ~21kb down of APOB                      | [7]       |
| <i>APOB</i>                            | rs7575840    | 02p24.01 | 21.127.245  | GT        | D              | LDL                                             | ~7kb down                               | [7]       |
| <i>APOB</i>                            | rs515135     | 02p24.01 | 21.139.812  | CT        | A              | LDL                                             | ~21kb down of APOB                      | [1, 2]    |
| <i>APOB</i>                            | rs562338     | 02p24.01 | 21.142.076  | CT        | D.A.           | LDL                                             | ~22kb down                              | [1, 7]    |
| <i>APOB</i>                            | rs754523     | 02p24.01 | 21.165.446  | AG        | D              | LDL, CAD                                        | ~45kb down                              | [1]       |
| <i>APOB</i>                            | rs4560142    | 02p24.01 | 21.237.472  | TC        | A              | LDL                                             | ~21kb down of APOB                      | [7]       |
| <i>APOB</i>                            | rs4591370    | 02p24.01 | 21.237.497  | GA        | A              | LDL                                             | ~21kb down of APOB                      | [7]       |
| <i>APOB</i>                            | rs538928     | 02p24.01 | 21.242.774  | AG        | D              | LDL                                             | ~122kb down                             | [7]       |
| <i>APOB</i>                            | rs576203     | 02p24.01 | 21.247.378  | GA        | A              | LDL                                             | ~21kb down of APOB                      | [7]       |
| <i>APOB</i>                            | rs488507     | 02p24.01 | 21.247.444  | GT        | D              | LDL                                             | ~127kb down                             | [7]       |
| <i>APOB</i>                            | rs506585     | 02p24.01 | 21.250.937  | AG        | A              | LDL                                             | ~21kb down of APOB                      | [7]       |
| <i>APOB</i>                            | rs478442     | 02p24.01 | 21.252.971  | TG        | A              | LDL                                             | ~21kb down of APOB                      | [7]       |
| <i>APOC1</i>                           | rs4420638    | 19q13.32 | 50.115.036  | GA        | A              | LDL, CAD                                        | APOC1 ~590bp up                         | [1, 2, 7] |

|                               |            |          |             |    |      |                                       |                                      |          |
|-------------------------------|------------|----------|-------------|----|------|---------------------------------------|--------------------------------------|----------|
| <i>APOE</i>                   | rs429358   | 19q13.32 | 50.104.031  | CT | A    | CAD, LDL                              | missense                             | [3]      |
| <i>ATXN2L; SH2B1</i>          | rs8049439  | 16p11.02 | 28.745.266  | CT | A    | BMI                                   | ATXN2L intron;<br>SH2B1 ~37kb down   | [8]      |
| <i>B3GALT4</i>                | rs12695382 | 06q21.32 | 120.431.111 | AG | D.A. | LDL                                   | intron                               | [1]      |
| <i>B3GALT4, RXRB, COL11A2</i> | rs2254287  | 06q21.32 | 33.252.176  | CG | A    | LDL                                   | SLC39A7 ~24kb down                   | [1]      |
| <i>BAZ1B; MLXIPL</i>          | rs714052   | 07q11.23 | 72.503.055  | AG | A    | TG                                    | BAZ1B intron;<br>MLXIPL ~142kb down  | [2]      |
| <i>BBS4</i>                   | rs7178130  | 15q24.01 | 70.765.505  | GA | A    | Bardet-Biedl Syndrome (209900),<br>OB | before 5'                            | [9]      |
| <i>BCAM</i>                   | rs10402271 | 19q13.32 | 50.021.304  | GT | A    | LDL, CAD                              | BCAM ~4kb up                         | [1, 7]   |
| <i>BCAM</i>                   | rs4605275  | 19q13.32 | 50.030.583  | CT | A    | LDL                                   | BCAM ~13kb up                        | [7]      |
| <i>BCDIN3D</i>                | rs7138803  | 12q13.13 | 48.533.985  | GA | D    | BMI                                   | FAIM2 ~13kb;<br>BCDIN3D ~10kb        | [8]      |
| <i>BCL11A</i>                 | rs10490072 | 02q16.01 | 60.523.685  | TC | A    | T2D                                   | BCL11A ~11kb down                    | [10]     |
| <i>BCL3</i>                   | rs4803750  | 19q13.31 | 49.939.717  | AG | A    | LDL                                   | BCL3 ~95kb                           | [7]      |
| <i>BCL7B; MLXIPL</i>          | rs17145738 | 07q11.23 | 72.621.060  | CT | D.A. | TG                                    | BCL7B ~11kb up;<br>MLXIPL ~56kb down | [1]      |
| <i>BDNF; BDNFOS</i>           | rs4074134  | 11p14.01 | 27,604,111  | AG | D    | BMI                                   | intron BDNFOS;<br>BDNF ~6kb down;    | [8]      |
| <i>BDNF; BDNFOS</i>           | rs4923461  | 11p14.01 | 27,613,736  | AG | A    | BMI                                   | intron BDNFOS;<br>BDNF ~6kb down;    | [8]      |
| <i>BDNF; BDNFOS</i>           | rs925946   | 11p14.01 | 27,624,028  | GT | D    | BMI                                   | intron BDNFOS;<br>BDNF ~6kb down;    | [8]      |
| <i>BDNF; BDNFOS</i>           | rs10501087 | 11p14.01 | 27,626,934  | TC | A    | BMI                                   | intron BDNFOS;<br>BDNF ~6kb down;    | [8]      |
| <i>BDNF; BDNFOS</i>           | rs6265     | 11p14.01 | 27,636,742  | GA | A    | BMI                                   | missense in BDNF                     | [8]      |
| <i>C12orf30</i>               | rs17696736 | 12q24.13 | 110.971.451 | AG | D    | T2D                                   | Intron                               | [8]      |
| <i>CACNA1D</i>                | rs4687736  | 03q23.01 | 53.720.402  | CG | A    | T2D                                   | intron                               | [11]     |
| <i>CACNA1D</i>                | rs3796347  | 03q23.01 | 53.768.180  | AG | D    | T2D                                   | intron                               | [11]     |
| <i>CAMK2A</i>                 | rs3822607  | 05q33.01 | 149.592.236 | CT | A    | T2D                                   | intron                               | [11]     |
| <i>CAPN10</i>                 | rs2975760  | 02q37.03 | 241.180.086 | CT | A    | T2D                                   | intron                               | [4]      |
| <i>CCDC93</i>                 | rs11684454 | 02q14.01 | 118,479,788 | AG | D    | OB                                    | intron                               | [4]      |
| <i>CDC123, CAMK1D</i>         | rs12779790 | 10q14.00 | 12.367.766  | AG | D    | T2D                                   | CAMK1D ~60kb;<br>CDC123 ~33kb        | [4]      |
| <i>CDKAL1</i>                 | rs10946398 | 06p23.03 | 20.769.263  | CA | A    | T2D                                   | intron                               | [12, 13] |
| <i>CDKAL1</i>                 | rs7754840  | 06p23.03 | 20.769.479  | GC | D    | T2D                                   | intron                               | [14, 15] |
| <i>CDKAL1</i>                 | rs9465871  | 06p23.03 | 20.825.484  | TC | D    | T2D                                   | intron                               | [10]     |
| <i>CDKN2B</i>                 | rs564398   | 09p21.03 | 22.019.797  | TC | A    | T2D                                   | intron                               | [11]     |
| <i>CDKN2B</i>                 | rs10811661 | 09p21.03 | 22.124.344  | CT | D    | T2D                                   | CDKN2BAS ~12kb up                    | [12-16]  |
| <i>CELSR2</i>                 | rs6657811  | 01p13.03 | 109.609.056 | AT | A    | LDL                                   | intron                               | [7]      |
| <i>CELSR2</i>                 | rs4970834  | 01p13.03 | 109.616.653 | CT | A    | LDL                                   | intron                               | [7]      |
| <i>CELSR2</i>                 | rs611917   | 01p13.03 | 109.617.025 | CT | D    | LDL                                   | intron                               | [7]      |

|                       |            |          |             |    |   |                      |                                                      |        |
|-----------------------|------------|----------|-------------|----|---|----------------------|------------------------------------------------------|--------|
| <i>CELSR2</i>         | rs12740374 | 01p13.03 | 109.619.363 | GT | A | LDL                  | 3'UTR                                                | [2, 7] |
| <i>CELSR2</i>         | rs660240   | 01p13.03 | 109.619.611 | AG | D | LDL                  | 3'UTR                                                | [7]    |
| <i>CELSR2</i>         | rs629301   | 01p13.03 | 109.620.079 | AC | A | LDL                  | down 3' <i>CELSR2</i>                                | [7]    |
| <i>CELSR2</i>         | rs646776   | 01p13.03 | 109.620.303 | AG | A | LDL                  | down 3' <i>CELSR2</i>                                | [7]    |
| <i>CELSR2</i>         | rs602633   | 01p13.03 | 109.623.284 | AC | D | LDL                  | 4kb down <i>CELSR2</i> ;<br>up of 5' <i>PSRC1</i>    | [1, 7] |
| <i>CELSR2</i>         | rs599839   | 01p13.03 | 109.623.939 | GA | D | LDL                  | down 3' <i>CELSR2</i> ;<br>up of 5' <i>PSRC1</i>     | [1, 7] |
| <i>CETP</i>           | rs9989419  | 16q13.00 | 55.542.890  | GA | D | HDL                  | <i>CETP</i> ~10kb down                               | [1]    |
| <i>CETP</i>           | rs173539   | 16q13.00 | 55.545.795  | TC | D | HDL                  | <i>CETP</i> ~8kb down                                | [2]    |
| <i>CETP</i>           | rs3764261  | 16q13.00 | 55.551.075  | CA | A | HDL                  | <i>CETP</i> ~3kb down                                | [1]    |
| <i>CETP</i>           | rs1864163  | 16q13.00 | 55.554.984  | GA | D | HDL                  | intron                                               | [1]    |
| <i>CHGA</i>           | rs941584   | 14q32.12 | 92.461.325  | AG | A | T2D                  | intron                                               | [11]   |
| <i>Chr 02 gap</i>     | rs6712932  | 02q12.01 | 105.204.280 | AG | D | T2D                  | <i>GPR45</i> ~20kb down                              | [17]   |
| <i>Chr 11 gap</i>     | rs9300039  | 11p12.00 | 41.872.192  | CA | A | T2D                  | <i>API5</i> ~1Mb down                                | [15]   |
| <i>Chr 12q13</i>      | rs11171739 | 11q13.02 | 54.757.142  | CT | A | T2D                  | <i>ERBB3</i> ~4kb down                               | [10]   |
| <i>Chr 1p13</i>       | rs6679677  | 01p13.02 | 114.105.581 | CA | D | T2D                  | -                                                    | [10]   |
| <i>Chr 21 gap</i>     | rs200801   | 21q21.01 | 18.255.767  | AG | A | T2D                  | mRNA's ~80kb up;<br><i>Chondrolectin</i> ~300kb down | [6]    |
| <i>Chr 21 gap</i>     | rs2254434  | 21q21.01 | 18.257.252  | GA | D | T2D                  | mRNA's ~80kb up;<br><i>Chondrolectin</i> ~300kb down | [6]    |
| <i>Chr 21 gap</i>     | rs158081   | 21q21.01 | 18.291.122  | AG | D | T2D                  | gene gap                                             | [6]    |
| <i>CILP2</i>          | rs16996148 | 09p13.11 | 19.519.722  | GT | A | LDL, TG              | <i>CLIP2</i> ~1kb up                                 | [1]    |
| <i>CILP2,PBX4</i>     | rs17216525 | 09p13.11 | 19.523.470  | CT | A | TG                   | <i>CILP2</i> ~5kb up;<br><i>PBX5</i> ~67kb down      | [2]    |
| <i>CLEC16A</i>        | rs12708716 | 16p13.13 | 11.087.624  | AG | D | T2D                  | intron                                               | [10]   |
| <i>CLEC2D</i>         | rs3764021  | 12p13.31 | 9.725.145   | GA | D | T2D                  | cds synon                                            | [10]   |
| <i>CTLA4</i>          | rs3087243  | 02q33.02 | 204.447.414 | GA | D | T2D                  | down <1kb                                            | [3]    |
| <i>CYP19A1 / GLDN</i> | rs2446405  | 15q21.02 | 49.434.335  | AT | A | IR                   | <i>GLDN</i> intron                                   | [18]   |
| <i>CYP3a5</i>         | rs776746   | 07q22.01 | 99.108.725  | AG | A | HT; salt sensitivity | intron                                               | [3, 5] |
| <i>DCD</i>            | rs1153188  | 12q13.02 | 53.385.513  | AT | A | T2D                  | <i>DCD</i> ~60kb up                                  | [4]    |
| <i>DOCK7</i>          | rs1748195  | 01p31.03 | 62.822.431  | GC | D | TG                   | intron                                               | [1]    |
| <i>DOCK7</i>          | rs10889353 | 01p31.03 | 62.891.034  | AC | A | TG                   | intron                                               | [2]    |
| <i>DPEP2</i>          | rs255052   | 16q22.01 | 66.582.746  | GA | A | HDL                  | intron                                               | [1]    |
| <i>EGFR</i>           | rs2075112  | 07p11.02 | 55.187.355  | GA | D | T2D                  | intron                                               | [11]   |
| <i>ENPP1</i>          | rs1044498  | 06q23.02 | 132.214.311 | CA | A | IR                   | missense                                             | [3]    |
| <i>ETV5; DGKG</i>     | rs7647305  | 03q27.02 | 187.317.234 | TC | D | BMI                  | <i>ETV5</i> ~8kb up;<br><i>DGKG</i> ~30kb down;      | [8]    |
| <i>EXT2</i>           | rs1113132  | 11p11.02 | 44.210.229  | CG | A | T2D                  | intron                                               | [16]   |
| <i>EXT2</i>           | rs11037909 | 11p11.02 | 44.212.440  | CT | D | T2D                  | intron                                               | [16]   |

|                          |            |          |             |    |   |              |                                     |              |
|--------------------------|------------|----------|-------------|----|---|--------------|-------------------------------------|--------------|
| <i>EXT2</i>              | rs3740878  | 11p11.02 | 44.214.628  | AG | A | T2D          | intron                              | [16]         |
| <i>FADS1-FADS2-FADS3</i> | rs174547   | 11q12.02 | 61.327.609  | CT | A | HDL,TG       | intron                              | [2]          |
| <i>FGF2; NUDT6</i>       | rs1048201  | 04q28.01 | 124.034.008 | CT | D | T2D          | 3'UTR in FGF2;<br>missense in NUDT6 | [11]         |
| <i>FOXA3</i>             | rs11669442 | 19q13.32 | 51.066.647  | TC | D | T2D          | intron                              | [11]         |
| <i>FTO</i>               | rs6499640  | 16q12.02 | 52.327.428  | AG | A | BMI          | intron                              | [8]          |
| <i>FTO</i>               | rs9939973  | 16q12.02 | 52.358.319  | GA | D | OB           | intron                              | [19]         |
| <i>FTO</i>               | rs1421085  | 16q12.02 | 52.358.705  | TC | D | BMI          | intron                              | [20]         |
| <i>FTO</i>               | rs1121980  | 16q12.02 | 52.366.998  | TC | A | BMI, OB, T2D | intron                              | [19, 21]     |
| <i>FTO</i>               | rs8050136  | 16q12.02 | 52.374.026  | AC | A | BMI          | intron                              | [8]          |
| <i>FTO</i>               | rs8050136  | 16q12.02 | 52.374.026  | AC | A | T2D, BMI     | intron                              | [12, 13, 15] |
| <i>FTO</i>               | rs3751812  | 16q12.02 | 52.376.211  | GT | D | BMI          | intron                              | [8]          |
| <i>FTO</i>               | rs9939609  | 16q12.02 | 52.377.778  | AT | A | BMI          | intron                              | [22]         |
| <i>FTO</i>               | rs9939609  | 16q12.02 | 52.378.278  | AT | A | T2D, BMI     | intron                              | [10]         |
| <i>FTO</i>               | rs7190492  | 16q12.02 | 52.386.503  | GA | A | BMI          | intron                              | [8]          |
| <i>FTO</i>               | rs9930506  | 16q12.02 | 52.388.216  | GA | A | BMI, WtH     | intron                              | [23]         |
| <i>FTO</i>               | rs8044769  | 16q12.02 | 52.396.886  | CT | A | BMI          | intron                              | [8]          |
| <i>G6PC2</i>             | rs560887   | 02q24.03 | 169.471.644 | GA | D | FGL          | intron                              | [10]         |
| <i>GAD2</i>              | rs2236418  | 10p12.01 | 26.545.752  | GA | A | OB           | 5'UTR                               | [3]          |
| <i>GALNT2</i>            | rs2144300  | 01q42.13 | 228.361.789 | CT | A | HDL, TG      | intron                              | [1]          |
| <i>GALNT2</i>            | rs4846914  | 01q42.13 | 228.362.564 | GA | A | HDL          | intron                              | [1, 2]       |
| <i>GCA</i>               | rs3788964  | 02q24.02 | 162.915.976 | AG | D | T2D          | intron                              | [24]         |
| <i>GCK</i>               | rs4607517  | 07p13.00 | 44.202.443  | GA | D | FGL          | GCK ~7kb up;                        | [24]         |
| <i>GCKR</i>              | rs1260326  | 02p23.03 | 27.584.694  | CT | D | TG           | missense                            | [1, 2]       |
| <i>GCKR</i>              | rs780094   | 02p23.03 | 27.594.991  | CT | D | TG           | intron                              | [1]          |
| <i>GNPDA2</i>            | rs10938397 | 04p13.00 | 44.877.534  | AG | D | BMI, OB, T2D | GNPDA2 ~454kb up                    | [21]         |
| <i>GRIN3A</i>            | rs1323432  | 09q31.01 | 103.403.008 | AG | D | HDL          | intron                              | [1]          |
| <i>HHEX</i>              | rs1111875  | 10q23.33 | 94.453.112  | TC | D | T2D          | HHEX ~8kb up                        | [13-16]      |
| <i>HHEX</i>              | rs5015480  | 10q23.33 | 94.455.789  | CT | A | T2D          | HHEX ~10kb up                       | [12, 13]     |
| <i>HHEX</i>              | rs7923837  | 10q23.33 | 94.472.147  | GA | A | T2D          | HHEX ~27kb up                       | [16]         |
| <i>HLA-DQA1</i>          | rs9272346  | 06p21.32 | 32.712.600  | AG | D | T2D          | HLA-DQA1 ~500bp down                | [10]         |
| <i>HLA-DRB1</i>          | rs9270986  | 06p21.32 | 32.682.288  | CA | D | T2D          | HLA-DRB1 ~28kb up                   | [10]         |
| <i>HMGCR</i>             | rs3846663  | 05q13.03 | 74.691.732  | TC | A | LDL          | intron                              | [2]          |
| <i>HNFI1A</i>            | rs2650000  | 12q24.31 | 119.873.595 | CA | D | LDL          | HNFI1A ~28kb down                   | [2]          |
| <i>HNFI1B</i>            | rs757210   | 17q12.00 | 33.170.878  | AG | A | T2D          | intron                              | [12]         |
| <i>HNFI1B</i>            | rs7501939  | 17q12.00 | 33.175.519  | CT | D | T2D          | intron                              | [11]         |
| <i>HNFI4A</i>            | rs1800961  | 20q13.12 | 42.476.028  | CT | D | HDL          | missense                            | [2]          |
| <i>IFIH1</i>             | rs1990760  | 02q24.02 | 162.832.547 | CT | A | T2D          | missense                            | [10]         |

|                      |            |          |             |           |      |                                        |                                 |                  |
|----------------------|------------|----------|-------------|-----------|------|----------------------------------------|---------------------------------|------------------|
| <i>IGF2BP2</i>       | rs4402960  | 03q27.02 | 186.994.631 | GT        | D    | T2D                                    | intron                          | [12-16]          |
| <i>IGF2BP2</i>       | rs1470579  | 03q27.02 | 187.012.024 | CA        | A    | T2D                                    | intron                          | [14]             |
| <i>IL2RA</i>         | rs706778   | 10p15.01 | 6.139.205   | AG        | A    | T2D                                    | intron                          | [10]             |
| <i>IL2RA</i>         | rs2104286  | 10p15.01 | 6.139.301   | AG        | D    |                                        | intron                          | [10]             |
| <i>INS</i>           | rs689      | 11p15.05 | 2.139.050   | TA        | A    | T2D                                    | intron                          | [10]             |
| <i>INSIG2</i>        | rs7566605  | 02q14.01 | 118.552.745 | GC        | D    | OB                                     | INSIG2 ~10kb down               | [17]             |
| <i>JAZF1</i>         | rs864745   | 07p15.01 | 28.147.331  | TC        | A    | T2D                                    | intron                          | [4]              |
| <i>KCNJ11</i>        | rs5219     | 11p15.01 | 17.366.398  | TA (ACGT) | A    | T2D                                    | nonsense                        | [10, 12, 14, 15] |
| <i>KCNJ12</i>        | rs5215     | 11p15.01 | 17.365.456  | TC        | D    |                                        | missense                        | [10, 13]         |
| <i>KCTD10; MYO1H</i> | rs2338104  | 12q24.11 | 108.379.801 | GC        | A    | HDL                                    | KCTD10 intron;<br>MYO1H ~9kb up | [1, 2]           |
| <i>KCTD15</i>        | rs29941    | 19q13.11 | 39.001.622  | CT        | A    | BMI                                    | KCTD15 ~6kb up                  | [8]              |
| <i>KCTD15</i>        | rs11084753 | 19q13.11 | 39.014.227  | GA        | A    | BMI, OB, T2D                           | KCTD15 ~17kb up                 | [21]             |
| <i>KIAA1109</i>      | rs6534347  | 04q27.00 | 123.418.135 | GA        | D    | T2D                                    | intron                          | [10]             |
| <i>LDLR</i>          | rs11668477 | 19p13.02 | 11.056.280  | AG        | A    | LDL                                    | LDLR ~4kb down                  | [7]              |
| <i>LDLR</i>          | rs6511720  | 19p13.02 | 11.063.556  | GT        | A    | LDL; CAD                               | intron                          | [1, 2]           |
| <i>LDLR</i>          | rs2228671  | 19p13.02 | 11.072.162  | TC        | D    | LDL                                    | cds synon                       | [7]              |
| <i>LIPC</i>          | rs4775041  | 15q22.01 | 56.462.237  | GC        | A;D  | TG; HDL                                | LIPC ~45kb down                 | [1]              |
| <i>LIPC</i>          | rs10468017 | 15q22.01 | 56.466.054  | CT        | A;D  | HDL                                    | LIPC ~45kb down                 | [1, 2]           |
| <i>LIPC</i>          | rs261332   | 15q22.01 | 56.514.867  | AG        | D.A. | HDL                                    | intron                          | [1]              |
| <i>LIPG</i>          | rs4939883  | 18q21.01 | 45.421.462  | TC        | A    | HDL                                    | LIPIG ~49kb up                  | [1, 2]           |
| <i>LIPG</i>          | rs2156552  | 18q21.01 | 45.435.916  | AT        | D    | HDL                                    | LIPIG ~63kb up                  | [1]              |
| <i>LOC387761</i>     | rs7480010  | 11p12.00 | 42.203.544  | GA        | A    | T2D                                    | API5 ~1Mb down                  | [16]             |
| <i>LOC441171</i>     | rs9494266  | 06q23.03 | 135.893.516 | AG        | A    | T2D                                    | AHI1 up ~33kb                   | [6]              |
| <i>LPL</i>           | rs2197089  | 08p21.03 | 19.870.903  | GA        | D.A. | HDL, TG                                | LPL ~2kb up                     | [1]              |
| <i>LPL</i>           | rs12678919 | 08p21.03 | 19.888.752  | AG        | D.A. | HDL, TG                                | LPL ~18kb up                    | [1, 2]           |
| <i>LPL</i>           | rs10503669 | 08p21.03 | 19.892.220  | CA        | A    | HDL, TG                                | LPL ~23kb up                    | [1]              |
| <i>LPL</i>           | rs6993414  | 08p21.03 | 19.947.448  | AG        | A    | TG                                     | LPL ~79kb up                    | [1]              |
| <i>LPL</i>           | rs6586891  | 08p21.03 | 19.959.128  | AC        | D    | HDL, TG                                | LPL ~90kb up                    | [1]              |
| <i>MAF</i>           | rs1424233  | 16q23.02 | 78.240.502  | AG        | A    | BMI                                    | MAF ~48kb up                    | [20]             |
| <i>MAFB</i>          | rs6102059  | 20q12.00 | 38.662.448  | CT        | A    | LDL                                    | MAFB ~86kb down                 | [2]              |
| <i>MC4R</i>          | rs17782313 | 18q21.32 | 56.002.327  | TC        | D    | BMI                                    | MC4R ~187kb down                | [20]             |
| <i>MC4R</i>          | rs12970134 | 18q21.32 | 56.035.980  | GA        | D    | BMI, T2D                               | MC4R ~53kb down                 | [8]              |
| <i>MTCH2</i>         | rs4752856  | 11p11.02 | 47.604.868  | GA        | D    | BMI, OB, T2D                           | intron                          | [21]             |
| <i>MTCH2</i>         | rs10838738 | 11p11.02 | 47.619.875  | AG        | D    | BMI                                    | intron                          | [1]              |
| <i>MTMR9</i>         | rs2293855  | 08p23.01 | 11.215.070  | GA        | A    | OB                                     | intron                          | [25]             |
| <i>MTNR1B</i>        | rs1387153  | 11q21.00 | 92.313.726  | CT        | D    | FGL                                    | MTNR1B ~29kb down               | [26]             |
| <i>MTNR1B</i>        | rs10830963 | 11q21.00 | 92.348.608  | CG        | D    | FGL, Early insulin response to glucose | intron                          | [24, 27]         |

|                          |            |          |             |    |   |              |                                                 |            |
|--------------------------|------------|----------|-------------|----|---|--------------|-------------------------------------------------|------------|
| <i>MYO10</i>             | rs31313    | 05p15.01 | 16.744.004  | AG | A | T2D          | intron                                          | [11]       |
| <i>MYO10</i>             | rs173738   | 05p15.01 | 16.779.130  | GA | D | T2D          | intron                                          | [11]       |
| <i>MYO10</i>             | rs253336   | 05p15.01 | 16.893.891  | CA | D | T2D          | intron                                          | [11]       |
| <i>NCAN</i>              | rs2228603  | 09p13.11 | 19.191.174  | CT | A | LDL          | missense                                        | [1]        |
| <i>NEGR1</i>             | rs3101336  | 01p31.01 | 72.524.023  | AG | D | BMI          | NERG1 ~3kb up                                   | [8]        |
| <i>NEGR1</i>             | rs2568958  | 01p31.01 | 72.537.954  | GA | D | BMI          | NERG1 ~17kb up                                  | [8]        |
| <i>NEGR1</i>             | rs2815752  | 01p31.01 | 72.585.278  | CT | D | BMI, OB, T2D | NERG1 ~64kb up                                  | [21]       |
| <i>NFATC1</i>            | rs643705   | 19q23.00 | 75.262.909  | CG | ? | T2D          | intron                                          | [11]       |
| <i>NFATC1</i>            | rs3826567  | 19q23.00 | 75.300.716  | CT | D | T2D          | intron                                          | [11]       |
| <i>NFKB1</i>             | rs230498   | 04q24.00 | 103.708.889 | GA | A | T2D          | intron                                          | [11]       |
| <i>NFKB1</i>             | rs230539   | 04q24.00 | 103.714.820 | AG | A | T2D          | intron                                          | [11]       |
| <i>NFKB1</i>             | rs11722146 | 04q24.00 | 103.743.917 | AG | A | T2D          | intron                                          | [11]       |
| <i>NFKB1</i>             | rs1609798  | 04q24.00 | 103.756.738 | CT | A | T2D          | intron                                          | [11]       |
| <i>NLRC5</i>             | rs1566439  | 16q13.00 | 55.582.413  | TC | A | HDL          | intron                                          | [11]       |
| <i>NOTCH2</i>            | rs10923931 | 01p12.00 | 120.319.732 | GT | D | T2D          | intron                                          | [11]       |
| <i>NPC1</i>              | rs1805081  | 18q11.02 | 19.394.680  | AG | A | BMI          | missense                                        | [20]       |
| <i>NRXN3</i>             | rs10146997 | 14q31.01 | 79.015.165  | GA | A | BMI, WtH     | intron                                          | [28]       |
| <i>NUTF2</i>             | rs2271293  | 16q22.01 | 66.459.821  | GA | A | HDL          | intron                                          | [2]        |
| <i>PAX6</i>              | rs628224   | 11p13.00 | 31.776.000  | GA | A | T2D          | intron                                          | [11]       |
| <i>PBX1</i>              | rs7535186  | 01q23.03 | 162.834.520 | GA | D | T2D          | intron                                          | [11]       |
| <i>PCSK1</i>             | rs6235     | 05q15.00 | 95.754.904  | GC | D | BMI, OB, T2D | missense                                        | [3, 9, 29] |
| <i>PCSK1</i>             | rs6232     | 05q15.00 | 95.777.791  | AG | D | BMI, OB, T2D | missense                                        | [9, 29]    |
| <i>PCSK9</i>             | rs11206510 | 01p32.03 | 55.268.877  | CT | D | LDL, CAD     | PCSK9 ~9kb down                                 | [1, 2]     |
| <i>PFPK</i>              | rs6602024  | 10p15.02 | 3.145.487   | GA | D | BMI          | intron                                          | [23]       |
| <i>PLTP</i>              | rs7679     | 20q13.12 | 44.010.159  | TC | D | HDL, TG      | 3' UTR                                          | [2]        |
| <i>PPARG</i>             | rs1801282  | 03p25.02 | 12.368.375  | CG | A | T2D          | intron / nonsense                               | [11]       |
| <i>PRL</i>               | rs4712652  | 06p22.03 | 22.186.844  | AG | A | BMI          | PRL ~208kb up                                   | [20]       |
| <i>PSRC1</i>             | rs599839   | 01p13.03 | 109.623.939 | GA | D | LDL, CAD     | up of 5' PSRC1                                  | [1, 7]     |
| <i>PTER</i>              | rs10508503 | 10p13.00 | 16.340.207  | CT | A | BMI          | PTER ~179kb down                                | [20]       |
| <i>PTPN22</i>            | rs2476601  | 01p13.02 | 114.179.341 | GA | D | T2D          | missense                                        | [10]       |
| <i>PTPN23</i>            | rs6679677  | 01p13.02 | 114.105.581 | CA | D | T2D          | RSBN1 ~45kb down                                | [10]       |
| <i>RAB11B</i>            | rs2967605  | 19p13.02 | 8.375.988   | CT | D | HDL          | RAB11B ~17kb up                                 | [2]        |
| <i>RBKS</i>              | rs11127129 | 02p23.02 | 27.930.462  | CG | A | TG           | intron                                          | [1]        |
| <i>SEC16B</i>            | rs10913469 | 01q25.02 | 176.180.392 | CT | A | BMI          | intron                                          | [8]        |
| <i>SF4; NCAN; TM6SF2</i> | rs10401969 | 09p13.11 | 19.268.968  | TC | A | TG           | SF4 intron;<br>NCAN ~45kb up;<br>TM6F2 ~24kb up | [1, 2]     |
| <i>SH2B1</i>             | rs4788102  | 16p11.02 | 28.781.149  | GA | D | BMI          | SH2B1 ~1,4kb down                               | [8]        |

|                     |            |          |             |    |   |                                              |                                    |                     |
|---------------------|------------|----------|-------------|----|---|----------------------------------------------|------------------------------------|---------------------|
| <i>SH2B1</i>        | rs7498665  | 16p11.02 | 28.790.992  | GA | A | BMI, OB, T2D                                 | missense                           | [21]                |
| <i>SLC12A3</i>      | rs12596776 | 16q13.00 | 55.477.099  | CG | A | HDL                                          | intron                             | [1]                 |
| <i>SLC2A2</i>       | rs5400     | 03q26.02 | 172.215.244 | TC | A | T2D                                          | missense                           | [3]                 |
| <i>SLC30A8</i>      | rs13266634 | 08q24.11 | 118.254.214 | CT | A | T2D                                          | missense                           | [12-16]             |
| <i>STK32C</i>       | rs7910485  | 10q26.03 | 133.899.573 | GA | D | T2D                                          | intron                             | [6]                 |
| <i>SYN2, PPARG</i>  | rs17036101 | 03p25.02 | 12.253.095  | AG | D | T2D                                          | SYN2 ~45kb up;<br>PPARG ~51kb down | [3, 10, 12, 14, 15] |
| <i>TCF7L2</i>       | rs17747324 | 10q25.02 | 114.742.743 | TC | D | T2D                                          | intron                             | [15]                |
| <i>TCF7L2</i>       | rs7901695  | 10q25.02 | 114.744.328 | GA | A | T2D                                          | intron LD to 7903146               | [6, 10, 12, 15]     |
| <i>TCF7L2</i>       | rs4506565  | 10q25.02 | 114.746.281 | TA | A | T2D                                          | intron                             | [10]                |
| <i>TCF7L2</i>       | rs7903146  | 10q25.02 | 114.748.589 | TC | A | T2D                                          | intron                             | [10, 14-16, 30]     |
| <i>TCF7L2</i>       | rs12255372 | 10q25.02 | 114.799.142 | CA | D | T2D                                          | intron                             | [6, 30]             |
| <i>THADA</i>        | rs7578597  | 02p21.00 | 43.586.577  | TC | A | T2D                                          | missense                           | [4]                 |
| <i>TIMD4-HAVCR1</i> | rs1501908  | 05q33.03 | 156.330.997 | CG | D | LDL                                          | TIMD4 ~8kb up                      | [2]                 |
| <i>TMEM18</i>       | rs2867125  | 02p24.03 | 613.077     | GA | A | BMI                                          | TMEM18 ~45kb down                  | [8]                 |
| <i>TMEM18</i>       | rs6548238  | 02p24.03 | 625.155     | CT | D | BMI, OB, T2D                                 | TMEM18 ~33kb down                  | [21]                |
| <i>TMEM18</i>       | rs4854344  | 02p24.03 | 628.394     | GT | D | BMI                                          | TMEM18 ~30kb down                  | [8]                 |
| <i>TMEM18</i>       | rs7561317  | 02p24.03 | 635.203     | AG | D | BMI                                          | TMEM18 ~23kb down                  | [6]                 |
| <i>TOMM40</i>       | rs2075650  | 19q13.31 | 50.087.709  | GA | A | LDL                                          | intron                             | [7]                 |
| <i>TRIB1</i>        | rs17321515 | 08q24.13 | 126.555.841 | AG | A | TG                                           | TRIB1 ~36kb upstream               | [1]                 |
| <i>TRIB1</i>        | rs2954029  | 08q24.13 | 126.560.404 | AT | A | TG                                           | TRIB1 ~41kb upstream               | [1, 2]              |
| <i>TSPAN8</i>       | rs7961581  | 12q21.01 | 69.949.619  | TC | D | T2D                                          | TSPAN8 ~112kb up                   | [4]                 |
| <i>TTC39B</i>       | rs471364   | 09p22.03 | 15.279.828  | TC | D | HDL                                          | intron                             | [2]                 |
| <i>TTC7B</i>        | rs942740   | 14q32.01 | 90.228.872  | GA | D | T2D                                          | intron                             | [6]                 |
| <i>TTC7B</i>        | rs1749718  | 14q32.01 | 90.253.330  | AG | A | T2D                                          | intron                             | [6]                 |
| <i>USF1</i>         | rs3737787  | 01q23.03 | 159.276.397 | CT | A | Familial combined hyperlipidemia<br>(144250) | 3'UTR                              | [3]                 |
| <i>VEGFA</i>        | rs9472138  | 06p21.01 | 43.919.990  | CT | D | T2D                                          | VEGFA ~58kb up                     | [4]                 |
| <i>WFS1</i>         | rs752854   | 04p16.01 | 6.333.112   | AG | A | T2D                                          | intron                             | [11]                |
| <i>WFS1</i>         | rs10010131 | 04p16.01 | 6.344.066   | GA | D | T2D                                          | intron                             | [12]                |
| <i>WFS1</i>         | rs10010131 | 04p16.01 | 6.344.066   | GA | A | T2D                                          | intron                             | [11]                |
| <i>WFS1</i>         | rs6446482  | 04p16.01 | 6.346.844   | CG | ? | T2D                                          | intron                             | [11]                |
| <i>WFS1</i>         | rs734312   | 04p16.01 | 6.354.505   | GA | D | T2D                                          | missense                           | [11]                |
| <i>XKR6-AMACIL2</i> | rs7819412  | 08p23.01 | 11.082.821  | AG | A | TG                                           | intron                             | [2]                 |

<sup>a</sup> Next to the keywords that were used to collect and select the candidate SNPs from the literature, the table also includes all reported associations with related quantitative traits.

Chr chromosome; A ancestral allele; D derived allele; BMI body mass index (OMIM ID: 606641); T2D type 2 diabetes (OMIM ID: 125853); OB obesity (OMIM ID: 601665); HT hypertension (OMIM ID: 145500); TG triglycerides; LDL low-density lipoprotein; HDL high-density lipoprotein; CAD coronary artery disease (OMIM ID:



608320); IR insulin resistance ; FGL fasting glucose level ; WtH waist to hip ratio ; UP upstream ; DOWN downstream; Chromosomal band according to UCSC Genome Browser (Feb. 2009 (GRCh37/hg19) Assembly) [31-33], Chromosomal position according to ref\_assembly at ncbi dbSNP (<http://www.ncbi.nlm.nih.gov>).

## References

1. Willer CJ, Sanna S, Jackson AU, Scuteri A, Bonnycastle LL, Clarke R, Heath SC, Timpson NJ, Najjar SS, Stringham HM *et al*: **Newly identified loci that influence lipid concentrations and risk of coronary artery disease**. *Nat Genet* 2008, **40**(2):161-169.
2. Kathiresan S, Willer CJ, Peloso GM, Demissie S, Musunuru K, Schadt EE, Kaplan L, Bennett D, Li Y, Tanaka T *et al*: **Common variants at 30 loci contribute to polygenic dyslipidemia**. *Nat Genet* 2009, **41**(1):56-65.
3. Di Rienzo A, Hudson RR: **An evolutionary framework for common diseases: the ancestral-susceptibility model**. *Trends Genet* 2005, **21**(11):596-601.
4. Zeggini E, Scott LJ, Saxena R, Voight BF, Marchini JL, Hu T, de Bakker PI, Abecasis GR, Almgren P, Andersen G *et al*: **Meta-analysis of genome-wide association data and large-scale replication identifies additional susceptibility loci for type 2 diabetes**. *Nat Genet* 2008, **40**(5):638-645.
5. Thompson EE, Kuttub-Boulos H, Witonsky D, Yang L, Roe BA, Di Rienzo A: **CYP3A variation and the evolution of salt-sensitivity variants**. *Am J Hum Genet* 2004, **75**(6):1059-1069.
6. Salonen JT, Uimari P, Aalto JM, Pirskanen M, Kaikkonen J, Todorova B, Hypponen J, Korhonen VP, Asikainen J, Devine C *et al*: **Type 2 diabetes whole-genome association study in four populations: the DiaGen consortium**. *Am J Hum Genet* 2007, **81**(2):338-345.
7. Sandhu MS, Waterworth DM, Debenham SL, Wheeler E, Papadakis K, Zhao JH, Song K, Yuan X, Johnson T, Ashford S *et al*: **LDL-cholesterol concentrations: a genome-wide association study**. *Lancet* 2008, **371**(9611):483-491.
8. Thorleifsson G, Walters GB, Gudbjartsson DF, Steinthorsdottir V, Sulem P, Helgadóttir A, Styrkarsdóttir U, Gretarsdóttir S, Thorlacius S, Jonsdóttir I *et al*: **Genome-wide association yields new sequence variants at seven loci that associate with measures of obesity**. *Nat Genet* 2009, **41**(1):18-24.
9. Benzinou M, Walley A, Lobbens S, Charles MA, Jouret B, Fumeron F, Balkau B, Meyre D, Froguel P: **Bardet-Biedl syndrome gene variants are associated with both childhood and adult common obesity in French Caucasians**. *Diabetes* 2006, **55**(10):2876-2882.
10. The Wellcome Trust CCC: **Genome-wide association study of 14,000 cases of seven common diseases and 3,000 shared controls**. *Nature* 2007, **447**(7145):661-678.
11. Sandhu MS, Weedon MN, Fawcett KA, Wasson J, Debenham SL, Daly A, Lango H, Frayling TM, Neumann RJ, Sherva R *et al*: **Common variants in WFS1 confer risk of type 2 diabetes**. *Nat Genet* 2007, **39**(8):951-953.
12. McCarthy MI, Zeggini E: **Genome-wide association scans for Type 2 diabetes: new insights into biology and therapy**. *Trends Pharmacol Sci* 2007, **28**(12):598-601.
13. Zeggini E, Weedon MN, Lindgren CM, Frayling TM, Elliott KS, Lango H, Timpson NJ, Perry JR, Rayner NW, Freathy RM *et al*: **Replication of genome-wide association signals in UK samples reveals risk loci for type 2 diabetes**. *Science* 2007, **316**(5829):1336-1341.
14. Saxena R, Voight BF, Lyssenko V, Burtt NP, de Bakker PI, Chen H, Roix JJ, Kathiresan S, Hirschhorn JN, Daly MJ *et al*: **Genome-wide association analysis identifies loci for type 2 diabetes and triglyceride levels**. *Science* 2007, **316**(5829):1331-1336.
15. Scott LJ, Mohlke KL, Bonnycastle LL, Willer CJ, Li Y, Duren WL, Erdos MR, Stringham HM, Chines PS, Jackson AU *et al*: **A genome-wide association study of type 2 diabetes in Finns detects multiple susceptibility variants**. *Science* 2007, **316**(5829):1341-1345.
16. Sladek R, Rocheleau G, Rung J, Dina C, Shen L, Serre D, Boutin P, Vincent D, Belisle A, Hadjadj S *et al*: **A genome-wide association study identifies novel risk loci for type 2 diabetes**. *Nature* 2007, **445**(7130):881-885.
17. Herbert A, Gerry NP, McQueen MB, Heid IM, Pfeufer A, Illig T, Wichmann HE, Meitinger T, Hunter D, Hu FB *et al*: **A common genetic variant is associated with adult and childhood obesity**. *Science* 2006, **312**(5771):279-283.
18. Lo JC, Zhao X, Scuteri A, Brockwell S, Sowers MR: **The association of genetic polymorphisms in sex hormone biosynthesis and action with insulin sensitivity and diabetes mellitus in women at midlife**. *Am J Med* 2006, **119**(9 Suppl 1):S69-78.
19. Hinney A, Nguyen TT, Scherag A, Friedel S, Bronner G, Muller TD, Grallert H, Illig T, Wichmann HE, Rief W *et al*: **Genome wide association (GWA) study for early onset extreme obesity supports the role of fat mass and obesity associated gene (FTO) variants**. *PLoS One* 2007, **2**(12):e1361.

20. Meyre D, Delplanque J, Chevre JC, Lecoecur C, Lobbens S, Gallina S, Durand E, Vatin V, Degraeve F, Proenca C *et al*: **Genome-wide association study for early-onset and morbid adult obesity identifies three new risk loci in European populations.** *Nat Genet* 2009, **41**(2):157-159.
21. Renström F, Payne F, Nordstrom A, Brito EC, Rolandsson O, Hallmans G, Barroso I, Nordstrom P, Franks PW: **Replication and extension of genome-wide association study results for obesity in 4923 adults from northern Sweden.** *Hum Mol Genet* 2009, **18**(8):1489-1496.
22. Frayling TM, Timpson NJ, Weedon MN, Zeggini E, Freathy RM, Lindgren CM, Perry JR, Elliott KS, Lango H, Rayner NW *et al*: **A common variant in the FTO gene is associated with body mass index and predisposes to childhood and adult obesity.** *Science* 2007, **316**(5826):889-894.
23. Scuteri A, Sanna S, Chen WM, Uda M, Albai G, Strait J, Najjar S, Nagaraja R, Orru M, Usala G *et al*: **Genome-wide association scan shows genetic variants in the FTO gene are associated with obesity-related traits.** *PLoS Genet* 2007, **3**(7):e115.
24. Prokopenko I, Langenberg C, Florez JC, Saxena R, Soranzo N, Thorleifsson G, Loos RJ, Manning AK, Jackson AU, Aulchenko Y *et al*: **Variants in MTNR1B influence fasting glucose levels.** *Nat Genet* 2009, **41**(1):77-81.
25. Yanagiya T, Tanabe A, Iida A, Saito S, Sekine A, Takahashi A, Tsunoda T, Kamohara S, Nakata Y, Kotani K *et al*: **Association of single-nucleotide polymorphisms in MTMR9 gene with obesity.** *Hum Mol Genet* 2007, **16**(24):3017-3026.
26. Bouatia-Naji N, Bonnefond A, Cavalcanti-Proenca C, Sparso T, Holmkvist J, Marchand M, Delplanque J, Lobbens S, Rocheleau G, Durand E *et al*: **A variant near MTNR1B is associated with increased fasting plasma glucose levels and type 2 diabetes risk.** *Nat Genet* 2009, **41**(1):89-94.
27. Lyssenko V, Nagorny CL, Erdos MR, Wierup N, Jonsson A, Spegel P, Bugliani M, Saxena R, Fex M, Pulizzi N *et al*: **Common variant in MTNR1B associated with increased risk of type 2 diabetes and impaired early insulin secretion.** *Nat Genet* 2009, **41**(1):82-88.
28. Heard-Costa NL, Zillikens MC, Monda KL, Johansson A, Harris TB, Fu M, Haritunians T, Feitosa MF, Aspelund T, Eiriksdottir G *et al*: **NRXN3 is a novel locus for waist circumference: a genome-wide association study from the CHARGE Consortium.** *PLoS Genet* 2009, **5**(6):e1000539.
29. Kilpelainen TO, Bingham SA, Khaw KT, Wareham NJ, Loos RJ: **Association of variants in the PCSK1 gene with obesity in the EPIC-Norfolk study.** *Hum Mol Genet* 2009, **18**(18):3496-3501.
30. Scott LJ, Bonnycastle LL, Willer CJ, Sprau AG, Jackson AU, Narisu N, Duren WL, Chines PS, Stringham HM, Erdos MR *et al*: **Association of transcription factor 7-like 2 (TCF7L2) variants with type 2 diabetes in a Finnish sample.** *Diabetes* 2006, **55**(9):2649-2653.
31. King DC, Taylor J, Elnitski L, Chiaromonte F, Miller W, Hardison RC: **Evaluation of regulatory potential and conservation scores for detecting cis-regulatory modules in aligned mammalian genome sequences.** *Genome Res* 2005, **15**(8):1051-1060.
32. Kolbe D, Taylor J, Elnitski L, Eswara P, Li J, Miller W, Hardison R, Chiaromonte F: **Regulatory potential scores from genome-wide three-way alignments of human, mouse, and rat.** *Genome Res* 2004, **14**(4):700-707.
33. Kong A, Gudbjartsson DF, Sainz J, Jonsdottir GM, Gudjonsson SA, Richardsson B, Sigurdardottir S, Barnard J, Hallbeck B, Masson G *et al*: **A high-resolution recombination map of the human genome.** *Nat Genet* 2002, **31**(3):241-247.
